# Supplementary material
Source: publisher figshare collection journal article supplement (https://karger.figshare.com/ndownloader/files/35916479)
Supplement: Supplementary file 1 [file 35916479]

*Post-Task Evaluation Questionnaire*

**Basic Information**

**Gender:**

**Level of Training (Resident/Consultant):**

**Years of Training Post-Residency:**

**Number of f-URS cases done (circle accordingly): <25, 25-50, >50**

**Number of RIRS cases done (circle accordingly): <25, 25-50, >50**

On a scale of 1 to 10, please indicate your response for each of the navigation properties:

**Visibility During the Procedure**

***Please rate the difficulty of identification and establishment of access to all the renal calyces with the said ureteroscope.***

| **Brand A** | 1  Poor, Zero Visibility | 2 | 3 | 4 | 5 | 6 | 7 | 8 | 9 | 10  Excellent, Complete Visibility |
| --- | --- | --- | --- | --- | --- | --- | --- | --- | --- | --- |
|  |  |  |  |  |  |  |  |  |  |  |
| **Brand B** | 1  Poor, Zero Visibility | 2 | 3 | 4 | 5 | 6 | 7 | 8 | 9 | 10  Excellent, Complete Visibility |
|  |  |  |  |  |  |  |  |  |  |  |
| **Brand C** | 1  Poor, Zero Visibility | 2 | 3 | 4 | 5 | 6 | 7 | 8 | 9 | 10  Excellent, Complete Visibility |
|  |  |  |  |  |  |  |  |  |  |  |
| **Brand D** | 1  Poor, Zero Visibility | 2 | 3 | 4 | 5 | 6 | 7 | 8 | 9 | 10  Excellent, Complete Visibility |
|  |  |  |  |  |  |  |  |  |  |  |

**Deflection During the Procedure**

***Please rate the ease of attaining maximal deflection with the said ureteroscope.***

| **Brand A** | 1  Zero Deflection | 2 | 3 | 4 | 5 | 6 | 7 | 8 | 9 | 10  Complete Deflection |
| --- | --- | --- | --- | --- | --- | --- | --- | --- | --- | --- |
|  |  |  |  |  |  |  |  |  |  |  |
| **Brand B** | 1  Zero Deflection | 2 | 3 | 4 | 5 | 6 | 7 | 8 | 9 | 10  Complete Deflection |
|  |  |  |  |  |  |  |  |  |  |  |
| **Brand C** | 1  Zero Deflection | 2 | 3 | 4 | 5 | 6 | 7 | 8 | 9 | 10  Complete Deflection |
|  |  |  |  |  |  |  |  |  |  |  |
| **Brand D** | 1  Zero Deflection | 2 | 3 | 4 | 5 | 6 | 7 | 8 | 9 | 10  Complete Deflection |
|  |  |  |  |  |  |  |  |  |  |  |

**Maneuverability During the Procedure**

***Please rate the ease of navigation within the renal-calyceal system using the said ureteroscope.***

| **Brand A** | 1  Poor Maneuverability | 2 | 3 | 4 | 5 | 6 | 7 | 8 | 9 | 10  Excellent Maneuverability |
| --- | --- | --- | --- | --- | --- | --- | --- | --- | --- | --- |
|  |  |  |  |  |  |  |  |  |  |  |
| **Brand B** | 1  Poor Maneuverability | 2 | 3 | 4 | 5 | 6 | 7 | 8 | 9 | 10  Excellent Maneuverability |
|  |  |  |  |  |  |  |  |  |  |  |
| **Brand C** | 1  Poor Maneuverability | 2 | 3 | 4 | 5 | 6 | 7 | 8 | 9 | 10  Excellent Maneuverability |
|  |  |  |  |  |  |  |  |  |  |  |
| **Brand D** | 1  Poor Maneuverability | 2 | 3 | 4 | 5 | 6 | 7 | 8 | 9 | 10  Excellent Maneuverability |
|  |  |  |  |  |  |  |  |  |  |  |

**Stone Retrieval During the Procedure**

***Please rate the ease of stone retrieval from the calyces during the procedure.***

| **Brand A** | 1  Poor | 2 | 3 | 4 | 5 | 6 | 7 | 8 | 9 | 10  Excellent |
| --- | --- | --- | --- | --- | --- | --- | --- | --- | --- | --- |
|  |  |  |  |  |  |  |  |  |  |  |
| **Brand B** | 1  Poor | 2 | 3 | 4 | 5 | 6 | 7 | 8 | 9 | 10  Excellent |
|  |  |  |  |  |  |  |  |  |  |  |
| **Brand C** | 1  Poor | 2 | 3 | 4 | 5 | 6 | 7 | 8 | 9 | 10  Excellent |
|  |  |  |  |  |  |  |  |  |  |  |
| **Brand D** | 1  Poor | 2 | 3 | 4 | 5 | 6 | 7 | 8 | 9 | 10  Excellent |
|  |  |  |  |  |  |  |  |  |  |  |

**Image Quality During the Procedure**

***Please rate the quality of the images seen on the display during the procedure.***

| **Brand A** | 1  Poor Quality | 2 | 3 | 4 | 5 | 6 | 7 | 8 | 9 | 10  Excellent Quality |
| --- | --- | --- | --- | --- | --- | --- | --- | --- | --- | --- |
|  |  |  |  |  |  |  |  |  |  |  |
| **Brand B** | 1  Poor Quality | 2 | 3 | 4 | 5 | 6 | 7 | 8 | 9 | 10  Excellent Quality |
|  |  |  |  |  |  |  |  |  |  |  |
| **Brand C** | 1  Poor Quality | 2 | 3 | 4 | 5 | 6 | 7 | 8 | 9 | 10  Excellent Quality |
|  |  |  |  |  |  |  |  |  |  |  |
| **Brand D** | 1  Poor Quality | 2 | 3 | 4 | 5 | 6 | 7 | 8 | 9 | 10  Excellent Quality |
|  |  |  |  |  |  |  |  |  |  |  |

**Overall Assessment**

***How would you rate the said ureteroscope with an overall score?***

| **Brand A** | 1  Poor | 2 | 3 | 4 | 5 | 6 | 7 | 8 | 9 | 10  Excellent |
| --- | --- | --- | --- | --- | --- | --- | --- | --- | --- | --- |
|  |  |  |  |  |  |  |  |  |  |  |
| **Brand B** | 1  Poor | 2 | 3 | 4 | 5 | 6 | 7 | 8 | 9 | 10  Excellent |
|  |  |  |  |  |  |  |  |  |  |  |
| **Brand C** | 1  Poor | 2 | 3 | 4 | 5 | 6 | 7 | 8 | 9 | 10  Excellent |
|  |  |  |  |  |  |  |  |  |  |  |
| **Brand D** | 1  Poor | 2 | 3 | 4 | 5 | 6 | 7 | 8 | 9 | 10  Excellent |
|  |  |  |  |  |  |  |  |  |  |  |

*Questionnaire for Ureteroscopy Model Validation*

**Basic Information**

**Gender:**

**Level of Training (Resident/Consultant):**

**Years of Training Post-Residency:**

**Number of f-URS cases done (circle accordingly): <25, 25-50, >50**

**Number of RIRS cases done (circle accordingly): <25, 25-50, >50**

**Model Assessment**

On a scale of 1 to 10,

**How realistic is the simulation model in comparison to routine clinical practice?**

| **Realism of Simulator** | 1  Poor Replication | 2 | 3 | 4 | 5 | 6 | 7 | 8 | 9 | 10  Excellent  Replication |
| --- | --- | --- | --- | --- | --- | --- | --- | --- | --- | --- |

**How useful is the simulation model in evaluating all performance aspects of a flexible ureteroscopy?**

| **Utility of Simulator** | 1  Poor Utility | 2 | 3 | 4 | 5 | 6 | 7 | 8 | 9 | 10  Excellent  Utility |
| --- | --- | --- | --- | --- | --- | --- | --- | --- | --- | --- |
